# Supplementary material for: Effect of Ecological Factors on Nutritional Quality of Foxtail Millet (Setaria italica L.)
Source: MDPI journal article supplement (doi:10.3390/agronomy14020387), 2024-02-17
Supplement: s1 [file s1]

Supplementary Table S1. The main ecological factors of the twelve production areas.

| Area      | Available nitrogen (mg/kg) | Available phosphorus (mg/kg) | Available potassium (mg/kg) | Organic matters (g/kg) | Soil pH |
|-----------|----------------------------|------------------------------|-----------------------------|------------------------|---------|
| Hunyuan   | 32.13                      | 11.33                        | 123.4                       | 10.48                  | 8.59    |
| Shanyin   | 41.06                      | 11.03                        | 147.7                       | 15.61                  | 8.50    |
| Dingxiang | 33.98                      | 13.80                        | 134.1                       | 15.61                  | 8.22    |
| Xingxian  | 32.19                      | 30.02                        | 89.7                        | 4.46                   | 8.62    |
| Yangqu    | 71.40                      | 28.65                        | 261.7                       | 21.41                  | 7.88    |
| Yuci      | 33.98                      | 20.97                        | 281.3                       | 18.06                  | 7.98    |
| Taigu     | 32.19                      | 9.28                         | 103.6                       | 20.74                  | 8.72    |
| Xixian    | 24.99                      | 8.60                         | 58.0                        | 8.03                   | 8.67    |
| Qinxian   | 35.77                      | 7.39                         | 155.6                       | 16.95                  | 8.34    |
| Yuanqu    | 23.21                      | 21.06                        | 234.1                       | 3.57                   | 8.53    |
| Zezhou    | 23.25                      | 7.58                         | 140.1                       | 14.72                  | 8.40    |
| Yangcheng | 137.00                     | 58.82                        | 222.2                       | 6.15                   | 8.50    |

Supplementary Table S2. The variation analysis of foxtail millet nutrient component contents in twelve production areas.

|        | Moisture content<br>(%) | Crude fat content<br>(%) | Amylose content<br>(%) | Amylopectin content<br>(%) | Amylose/Amylopectin |
|--------|-------------------------|--------------------------|------------------------|----------------------------|---------------------|
| Max    | 9.13                    | 5.58                     | 24.74                  | 81.31                      | 4.84                |
| Min    | 6.75                    | 3.30                     | 14.61                  | 47.98                      | 2.41                |
| Mean   | 7.65                    | 4.48                     | 19.07                  | 67.61                      | 3.66                |
| SD     | 0.63                    | 0.63                     | 2.84                   | 9.03                       | 0.75                |
| CV (%) | 8.23                    | 14.01                    | 14.88                  | 13.36                      | 20.62               |

Supplementary Table S3. Eigenvalues of correlation matrix and eigenvectors of corresponding matrices for foxtail millet nutritional quality traits.

| Primary component          | Principal Component Number |          |          |          |          |          |
|----------------------------|----------------------------|----------|----------|----------|----------|----------|
|                            | 1                          | 2        | 3        | 4        | 5        |          |
| Eigenvalue                 | 5.09289                    | 3.80511  | 3.09467  | 2.16103  | 1.34744  |          |
| Percentage of variance (%) | 28.29384                   | 21.13953 | 17.19260 | 12.00575 | 7.48576  |          |
| Cumulative (%)             | 28.29384                   | 49.43337 | 66.62597 | 78.63171 | 86.11748 |          |
| Load factor                | MC                         | 0.11823  | 0.12689  | 0.25101  | 0.49163  | -0.07349 |
|                            | CFC                        | -0.35225 | -0.18821 | -0.01899 | 0.13634  | -0.01729 |
|                            | ACC                        | 0.20855  | 0.03443  | 0.44533  | 0.09297  | -0.12083 |
|                            | AP                         | -0.11059 | 0.45043  | 0.12601  | 0.10934  | 0.15159  |
|                            | AP/ACC                     | -0.23714 | 0.27702  | -0.29121 | 0.04841  | 0.15044  |
|                            | AP+ACC                     | -0.04171 | 0.42671  | 0.24599  | 0.12818  | 0.10512  |
|                            | V                          | 0.25389  | 0.10880  | -0.29138 | -0.29879 | 0.25365  |
|                            | Cr                         | 0.40811  | 0.04022  | -0.11980 | -0.03620 | 0.08726  |
|                            | Mn                         | 0.24651  | -0.20474 | 0.17005  | 0.05319  | 0.34022  |
|                            | Fe                         | 0.37301  | -0.06551 | -0.17653 | 0.08202  | 0.30591  |
|                            | Co                         | -0.16524 | 0.13542  | 0.32380  | -0.13898 | 0.45648  |
|                            | Ni                         | 0.28525  | 0.23939  | 0.09543  | -0.32442 | -0.08800 |
|                            | Cu                         | 0.28645  | 0.04426  | -0.28115 | 0.26409  | 0.01050  |
|                            | Zn                         | 0.03813  | 0.09753  | -0.34686 | 0.42198  | -0.17650 |

|    |          |          |          |          |          |
|----|----------|----------|----------|----------|----------|
| Se | -0.00878 | -0.42245 | 0.07570  | 0.22778  | 0.00137  |
| Sr | 0.03519  | 0.09876  | 0.00116  | -0.36574 | -0.55986 |
| Mo | -0.21405 | 0.29698  | -0.29503 | 0.06960  | 0.05289  |
| Sn | 0.27931  | 0.24979  | 0.10818  | 0.19320  | -0.27954 |

---

Supplementary Table S4. The correlation analysis between foxtail millet nutritional quality traits and ecological factors. \* and \*\* indicate significance at 0.05 and 0.01, respectively.

|        | Altitude | Longitude | Latitude | Average temperature | ≥10°C effective accumulated temperature | Diurnal temperature range | Average precipitation | Average humidity | Soil pH | Organic matters | Available nitrogen | Available phosphorus | Available potassium |
|--------|----------|-----------|----------|---------------------|-----------------------------------------|---------------------------|-----------------------|------------------|---------|-----------------|--------------------|----------------------|---------------------|
| MC     | 0.017    | 0.76*     | -0.029   | -0.111              | -0.467                                  | 0.309                     | 0.113                 | 0.347            | -0.005  | -0.253          | 0.043              | 0.027                | 0.059               |
| CFC    | -0.408   | -0.621    | -0.637*  | 0.536               | 0.331                                   | -0.516                    | 0.586                 | 0.471            | -0.018  | -0.082          | 0.046              | -0.01                | 0.203               |
| ACC    | 0.283    | 0.64*     | 0.084    | -0.28               | -0.361                                  | 0.218                     | -0.225                | 0.026            | -0.07   | -0.269          | -0.196             | -0.131               | 0.258               |
| AP     | -0.426   | 0.308     | -0.176   | 0.378               | -0.106                                  | -0.083                    | 0.267                 | 0.168            | 0.124   | -0.502          | 0.531              | 0.601                | 0.223               |
| AP/ACC | -0.522   | -0.249    | -0.163   | 0.462               | 0.238                                   | -0.174                    | 0.356                 | 0.124            | 0.187   | -0.13           | 0.458              | 0.425                | -0.138              |
| AP+ACC | -0.307   | 0.478     | -0.137   | 0.264               | -0.207                                  | -0.01                     | 0.178                 | 0.163            | 0.094   | -0.545          | 0.431              | 0.515                | 0.284               |
| V      | 0.42     | -0.056    | 0.701*   | -0.47               | 0.028                                   | 0.376                     | -0.657*               | -0.728*          | -0.057  | 0.244           | 0.032              | -0.029               | -0.212              |
| Cr     | 0.577    | 0.396     | 0.873*** | -0.817**            | -0.12                                   | 0.801**                   | -0.794**              | -0.389           | -0.305  | 0.365           | -0.523             | -0.477               | -0.2                |
| Mn     | 0.346    | -0.123    | 0.158    | -0.43               | -0.387                                  | 0.167                     | -0.144                | 0.104            | -0.702* | 0.364           | -0.288             | -0.135               | 0.43                |
| Fe     | 0.713*   | 0.197     | 0.828**  | -0.802**            | -0.13                                   | 0.721*                    | -0.818**              | -0.433           | -0.453  | 0.168           | -0.368             | -0.474               | 0.042               |
| Co     | -0.731*  | -0.15     | -0.588   | 0.685*              | 0.234                                   | -0.613                    | 0.509                 | 0.425            | 0.204   | -0.617          | 0.039              | 0.259                | 0.336               |
| Ni     | 0.359    | 0.51      | 0.638*   | -0.528              | -0.238                                  | 0.467                     | -0.584                | -0.479           | 0.054   | 0.184           | -0.182             | -0.084               | -0.294              |
| Cu     | 0.685*   | 0.318     | 0.859**  | -0.796**            | -0.054                                  | 0.905***                  | -0.793**              | -0.38            | -0.39   | 0.213           | -0.299             | -0.471               | -0.059              |
| Zn     | 0.317    | 0.164     | 0.365    | -0.259              | 0.292                                   | 0.525                     | -0.428                | -0.323           | -0.009  | 0.052           | 0.046              | -0.125               | 0.009               |
| Se     | 0.245    | -0.161    | -0.176   | -0.144              | -0.436                                  | -0.097                    | 0.236                 | 0.278            | -0.247  | 0.113           | -0.045             | -0.271               | 0.006               |
| Sr     | -0.138   | 0.234     | 0.333    | -0.179              | 0.396                                   | 0.337                     | -0.287                | -0.296           | 0.492   | 0.414           | -0.554             | -0.385               | -0.636*             |
| Mo     | -0.539   | -0.05     | -0.136   | 0.516               | 0.501                                   | -0.116                    | 0.198                 | 0.022            | 0.488   | -0.483          | 0.321              | 0.206                | -0.193              |
| Sn     | 0.350    | 0.97***   | 0.572    | -0.505              | -0.246                                  | 0.693*                    | -0.529                | -0.258           | 0.265   | -0.134          | -0.218             | -0.29                | -0.381              |
